# Supplementary material for: [(CF3)4Au2(C5H5N)2] – a new alkyl gold(ii) derivative with a very short Au–Au bond
Source: Royal Society of Chemistry journal article supplement (doi:10.1039/c2cc33735e), 2012-01-01
Supplement: c2cc33735e.pdf [file c2cc33735e.pdf]

### Electronic Supporting information:

#### **[(CF<sub>3</sub>)<sub>4</sub>Au<sub>2</sub>(C<sub>5</sub>H<sub>4</sub>N)<sub>2</sub>] – the first alkyl gold(II) derivative with an extremely short Au-Au bond**

David Zopes,<sup>[a]</sup> Corinna Hegemann,<sup>[a]</sup> Wieland Tyrra\*<sup>[a]</sup> and Sanjay Mathur\*<sup>[a]</sup>

Routine NMR spectra were recorded on the Bruker spectrometer AVANCE II 300 at 298 K; frequencies (external standards): <sup>13</sup>C 75.5 MHz (TMS), <sup>19</sup>F 282.4 MHz (CCl<sub>3</sub>F), <sup>1</sup>H 300.1 MHz (TMS); positive shifts denote downfield resonances. <sup>109</sup>Ag NMR experiment was run on a Bruker Avance 400 spectrometer (resonance frequency for <sup>1</sup>H 400.13 MHz, <sup>13</sup>C 100.6 MHz and <sup>109</sup>Ag 18.61 MHz) at ambient temperature. C, H and N analyses were carried out with a HEKAtech Euro EA 3000 apparatus. Light irradiation experiments were enforced by an UV reactor of Helios Italquartz (λ = 352 nm).

#### **Reaction procedure [Ag(Py)<sub>2</sub>][Au(CF<sub>3</sub>)<sub>2</sub>]:**

[NMe<sub>4</sub>][Au(CF<sub>3</sub>)<sub>2</sub>] was synthesized as reported recently.<sup>[11]</sup> 0.463 g (1 eq, 1.13 mmol) of [NMe<sub>4</sub>][Au(CF<sub>3</sub>)<sub>2</sub>] was solved in a mixture of 15 ml dried methylene chloride and 2 ml of pyridine in an N<sub>2</sub> atmosphere. 0.219 g (1 eq, 1.13 mmol) Ag[BF<sub>4</sub>] was added to the colourless, light protected and well stirred solution; Instantly [NMe<sub>4</sub>][BF<sub>4</sub>] precipitated as white flocculation. After 3 h of stirring the reaction was finished and the solution was cooled down to -19 °C to achieve complete precipitation of [NMe<sub>4</sub>][BF<sub>4</sub>]. To obtain the solid yellowish white product in nearly quantitative yield, all volatile products were removed carefully at 0 °C under reduced pressure (1·10<sup>-2</sup> mbar).

Formula:

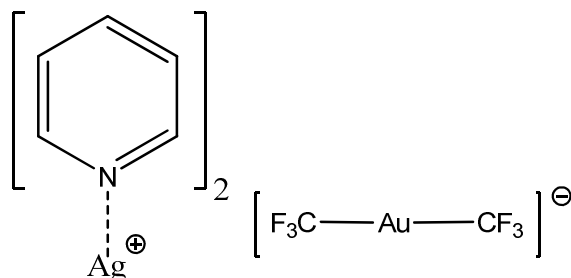

<sup>1</sup>H NMR (400.13 MHz, CD<sub>3</sub>CN, ppm) δ: 8.62 (H-2,6), 7.95 (H4), 7.54(H-3,5); <sup>13</sup>C APT NMR (100.6 MHz, CD<sub>3</sub>CN, ppm) δ: 163.0 ([Au(CF<sub>3</sub>)<sub>2</sub>]<sup>-</sup> qq, (<sup>1</sup>J(F,C) = 347 Hz, <sup>3</sup>J(F,C) = 19 Hz), 151.9 (C-2,6), 139.2 (C-3,5), 126.0 (C4); <sup>19</sup>F NMR (282.4 MHz, CD<sub>3</sub>CN, ppm) δ:

- 28.0 s, ( $^1J(\text{F},\text{C}) = 347$  Hz,  $^3J(\text{F},\text{C}) = 19$  Hz,  $^4J(\text{F},\text{F}) = 2$  Hz);  $^{109}\text{Ag}$  NMR (18.61 MHz, pyridine- $d_5$ , ppm)  $\delta$ : +404 s; CHNS analytic data for  $[\text{Ag}(\text{Py})_2][\text{Au}(\text{CF}_3)_2]$  in %: C: 23.7 (calculated 24.0); H: 2.4 (1.7); N: 5.0 (4.7).

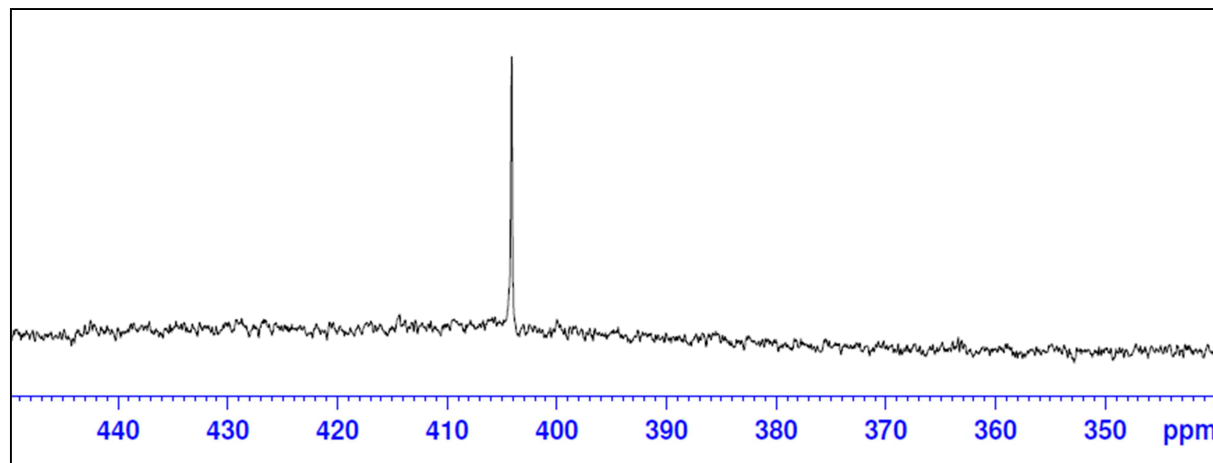

**Figure 1:**  $^{109}\text{Ag}$  NMR of  $[\text{Ag}(\text{Py})_2][\text{Au}(\text{CF}_3)_2]$  in pyridine- $d_5$ .

### Behaviour of $[\text{Ag}(\text{Py})_2][\text{Au}(\text{CF}_3)_2]$ in solution upon irradiation:

Time dependent  $^{19}\text{F}$  NMR measurements (282.4 MHz,  $\text{CD}_3\text{CN}$ ) shows the advancing oxidation of the  $[\text{Au}^{(+I)}(\text{CF}_3)_2]^-$  unit by silver $^{(+I)}$  leading to  $[\text{Au}_2^{(+II)}(\text{CF}_3)_4(\text{Py})_2]$ , which spontaneously disproportionated in solution into the couple  $[\text{Au}^{(+I)}(\text{CF}_3)\text{Py}]$  and  $[\text{Au}^{(+III)}(\text{CF}_3)_3\text{Py}]$  (equation 3). At the moment we can not exclude  $[\text{Au}^{(+III)}(\text{CF}_3)_4]^-$  is part of this equilibrium reaction such as equation 4 or had been brought in as impurity of the previous syntheses.

#### $[\text{Au}^{(+I)}(\text{CF}_3)\text{Py}]$ :

$^{19}\text{F}$  NMR (282.4 MHz,  $\text{CD}_3\text{CN}$ , ppm)  $\delta$ :  $[\text{Au}^{(+I)}(\text{CF}_3)\text{Py}]$ : -23.7 s, ( $^1J(\text{C},\text{F}) = 338$  Hz);  $^{13}\text{C}$  NMR (75.5 MHz,  $\text{CDCl}_3$ , ppm)  $\delta$ :  $[\text{Au}^{(+I)}(\text{CF}_3)\text{Py}]$  139.9.

#### $[\text{Au}^{(+III)}(\text{CF}_3)_3\text{Py}]$ :

$^{19}\text{F}$  NMR (282.4 MHz,  $\text{CD}_3\text{CN}$ , ppm)  $\delta$ :  $[\text{Au}^{(+III)}(\text{CF}_3)_3\text{Py}]$  -29.9 sept, ( $^1J(\text{C},\text{F}) = 347$  Hz,  $^4J(\text{F},\text{F}) = 6$  Hz); -38.1 qu, ( $^1J(\text{C},\text{F}) = 361$  Hz,  $^4J(\text{F},\text{F}) = 6$  Hz).  $^{13}\text{C}$  NMR (75.5 MHz,  $\text{CDCl}_3$ , ppm)  $\delta$ :  $[\text{Au}^{(+III)}(\text{CF}_3)_3\text{Py}]$  110.4, 136.3.

#### $[\text{Au}^{(+III)}(\text{CF}_3)_4]^-$ .<sup>[2]</sup>

$^{19}\text{F}$  NMR (282.4 MHz,  $\text{CD}_3\text{CN}$ , ppm)  $\delta$ :  $[\text{Au}^{(+III)}(\text{CF}_3)_4]^-$  - 34.7 s, ( $^1J(\text{C},\text{F}) = 354$  Hz),  $^{13}\text{C}$  NMR (75.5 MHz,  $\text{CDCl}_3$ , ppm)  $\delta$ : 135.9.

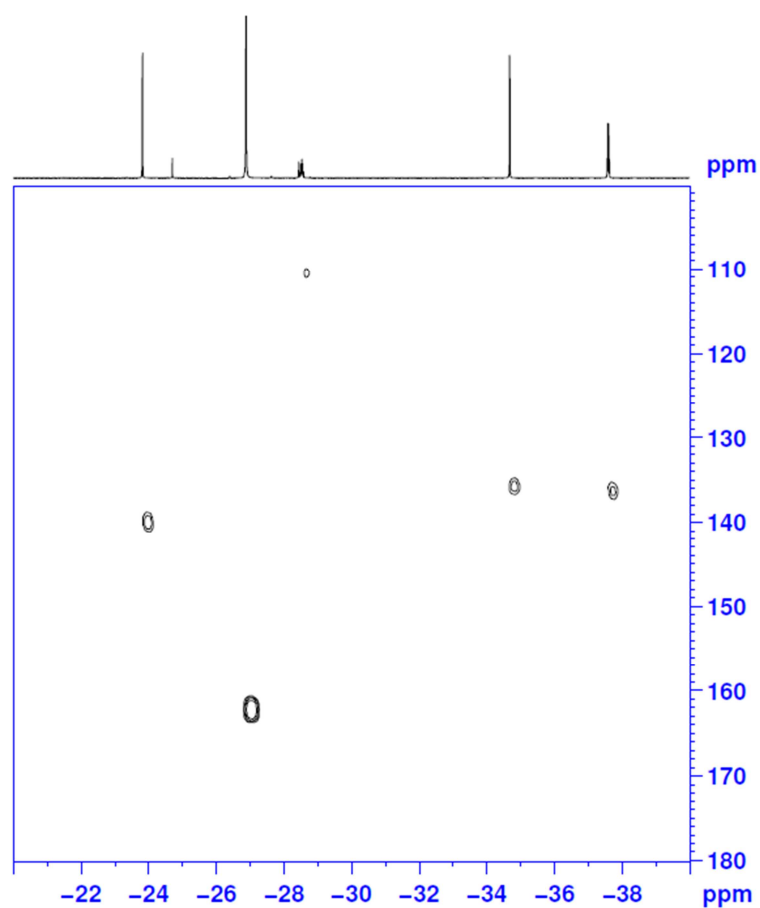

**Figure 2:** F,C-HSQC experiment of  $[\text{Ag}(\text{Py})_2][\text{Au}(\text{CF}_3)_2]$  in  $\text{CD}_3\text{CN}$  upon 20 h UV irradiation.

## Literature

- 
- [1] D. Zopes, S. Kremer, H. Scherer, L. Belkhoura, I. Pantenburg, W. Tyrra, S. Mathur, *Eur. J. Inorg. Chem.* **2011**, 273–280.
- [2] E. Bernhardt, M. Finze, H. Willner, *J. Fluorine Chem.* **2004**, 125, 967-973.
